# Supplementary material for: Elution of Divalent Cations from Iron Ore Mining Waste in an Indirect Aqueous Mineral Carbonation for Carbon Capture and Storage
Source: MDPI journal article supplement (doi:10.3390/su16020836), 2024-01-18
Supplement: s1 [file s1]

## Supplementary Information

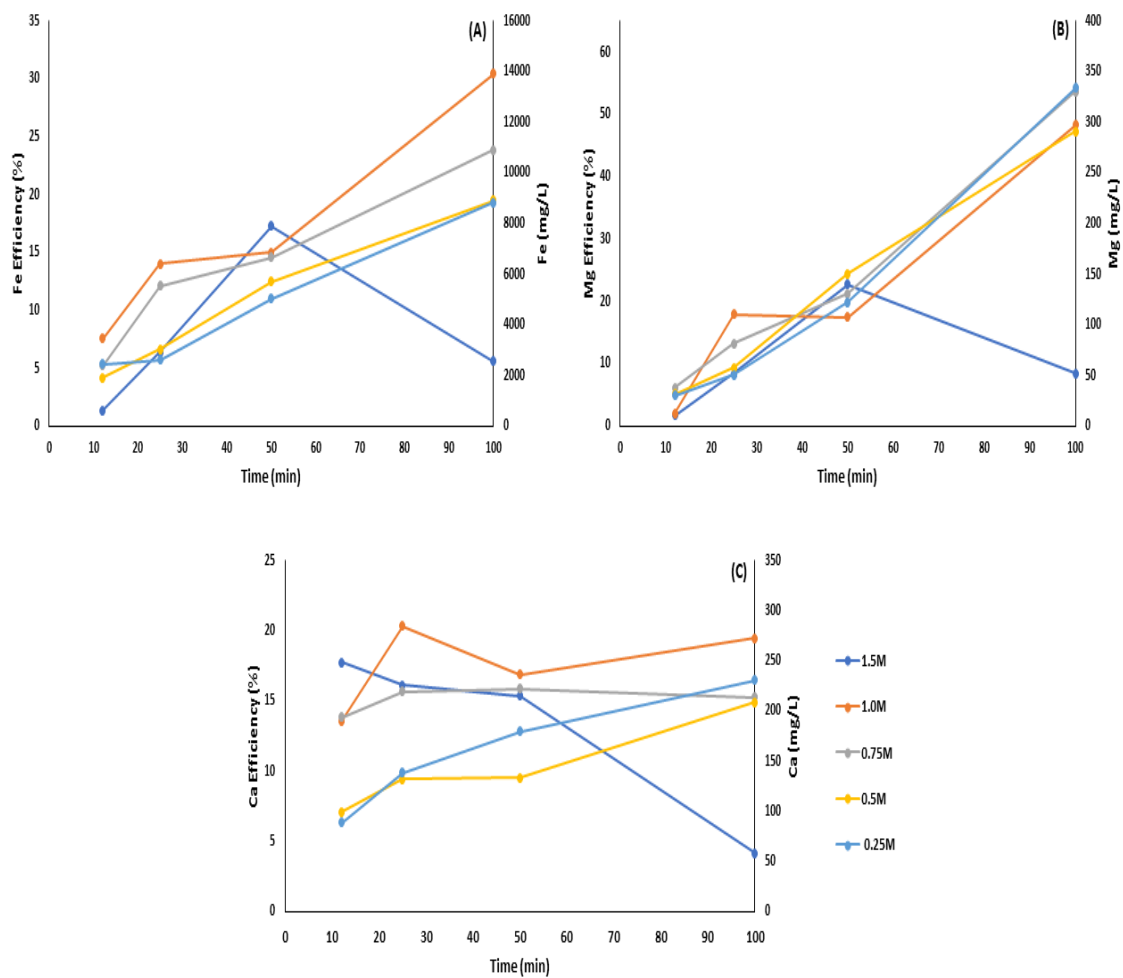

**Figure S1.** Elution efficiency as a function of reaction time using different concentrations of oxalic acid (A) Fe; (B) Mg; (C) Ca elution efficiency

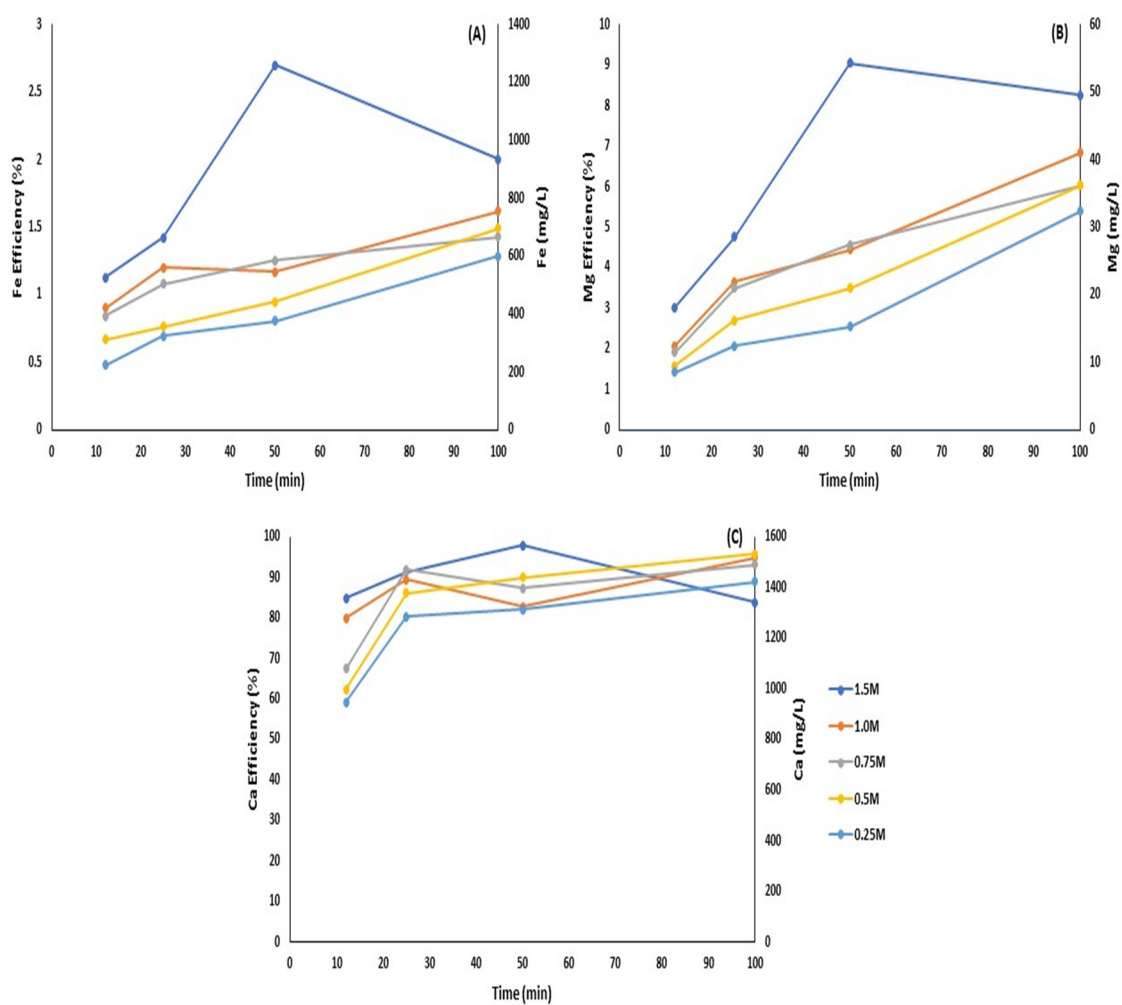

**Figure S2.** Elution efficiency as a function of reaction time using different concentrations of HCl (A) Fe; (B) Mg; (C) Ca elution efficiency

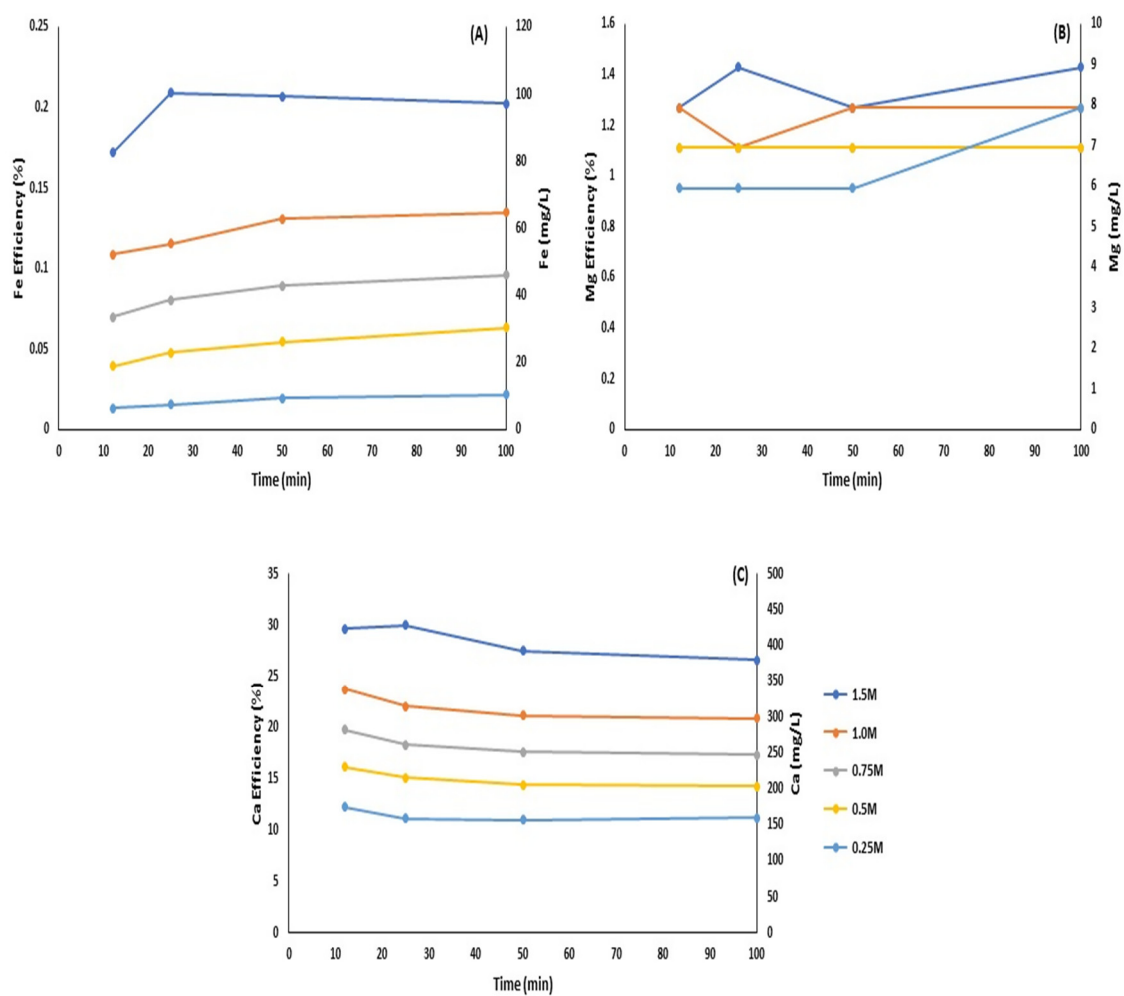

**Figure S3.** Elution efficiency as a function of reaction time using different concentration of formic acid (A) Fe; (B) Mg; (C) Ca elution efficiency.

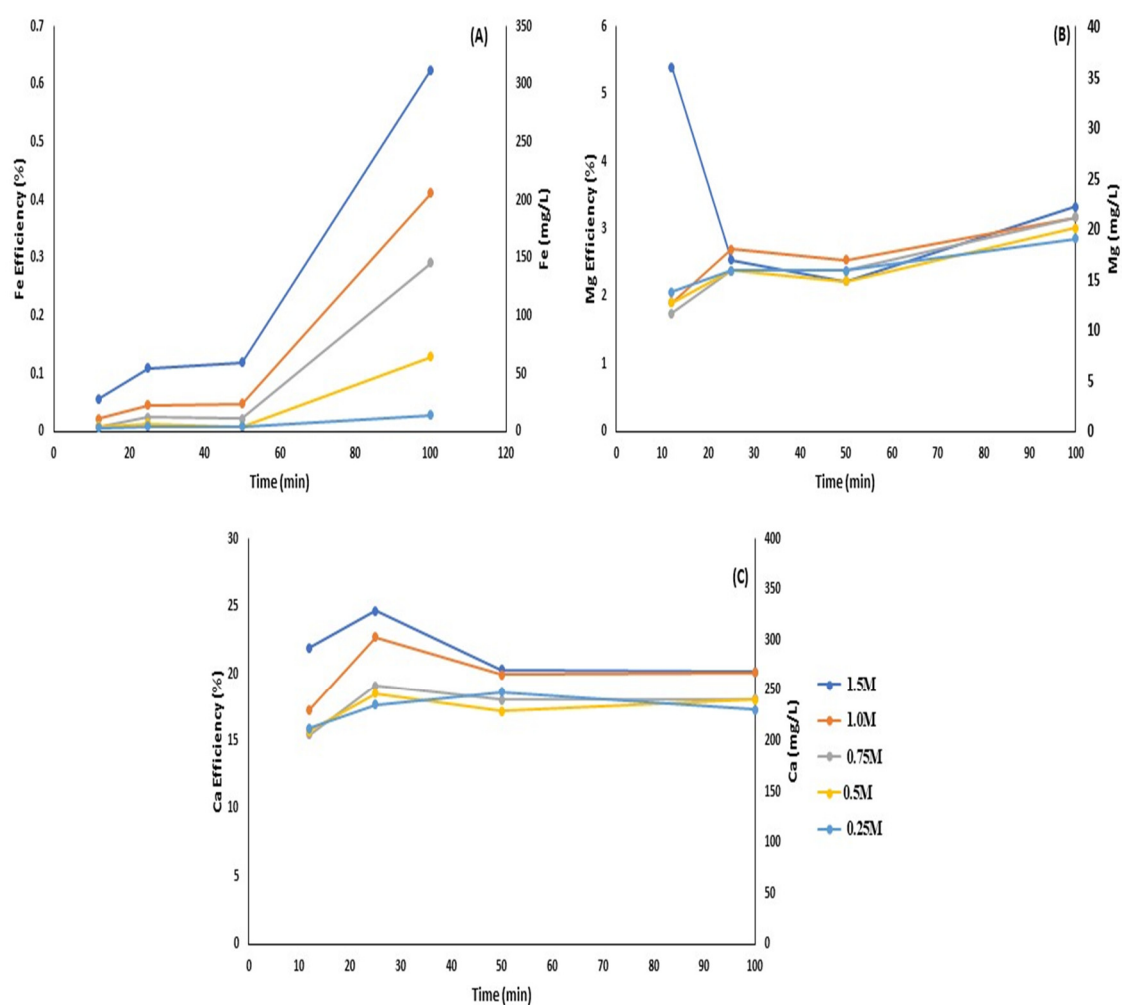

**Figure S4.** Elution efficiency as a function of reaction time using different concentrations of acetic acid (A) Fe; (B) Mg; (C) Ca elution efficiency.

| Oxalic Acid (Fe)     |        |           |      |       |         |      |
|----------------------|--------|-----------|------|-------|---------|------|
| Anova: Single Factor |        | Variable1 |      |       |         |      |
| Variable2            |        | 0.25M     | 0.5M | 0.75M | 1M      | 1.5M |
|                      | 12MIN  | 2454      | 1925 | 2395  | 3485    | 615  |
|                      | 25MIN  | 2623      | 3041 | 5568  | 6447.37 | 2943 |
|                      | 50MIN  | 5049      | 5745 | 6685  | 6889    | 7950 |
|                      | 100MIN | 8876.5    | 8955 | 10955 | 13973   | 2572 |

| Oxalic Acid (Mg)     |        |           |      |       |     |      |
|----------------------|--------|-----------|------|-------|-----|------|
| Anova: Single Factor |        | Variable1 |      |       |     |      |
| Variable2            |        | 0.25M     | 0.5M | 0.75M | 1M  | 1.5M |
|                      | 12MIN  | 31        | 32   | 39    | 13  | 11   |
|                      | 25MIN  | 52        | 59   | 83    | 113 | 53   |
|                      | 50MIN  | 125       | 154  | 134   | 110 | 143  |
|                      | 100MIN | 342       | 298  | 338   | 304 | 53   |

| HCl (Ca)             |        |           |      |       |      |      |
|----------------------|--------|-----------|------|-------|------|------|
| Anova: Single Factor |        | Variable1 |      |       |      |      |
| Variable2            |        | 0.25M     | 0.5M | 0.75M | 1M   | 1.5M |
|                      | 12MIN  | 859       | 903  | 979   | 1159 | 1230 |
|                      | 25MIN  | 1163      | 1247 | 1331  | 1296 | 1325 |
|                      | 50MIN  | 1190      | 1304 | 1266  | 1199 | 1419 |
|                      | 100MIN | 1289      | 1389 | 1351  | 1376 | 1214 |

**Figure S5.** Statistical Analysis ANOVA data table.
